# Supplementary material for: Diabetes mellitus and cardiovascular risk management in patients with rheumatoid arthritis: an international audit
Source: HighWire-hosted journal article supplement (doi:10.1136/rmdopen-2021-001724), 2021-07-01
Supplement: rmdopen-2021-001724supp001_data_supplement.pdf [file rmdopen-2021-001724supp001_data_supplement.pdf]

**Supplementary Table 1.** Rheumatoid arthritis (RA)-related factors and RA medications among RA patients with or without atherosclerotic cardiovascular disease (CVD) and with or without diabetes mellitus (DM)

|                                               | RA cases without atherosclerotic CVD |                         |                         |                         | P-value*         | RA cases with atherosclerotic CVD |                         |                         |                         | P-value*         |
|-----------------------------------------------|--------------------------------------|-------------------------|-------------------------|-------------------------|------------------|-----------------------------------|-------------------------|-------------------------|-------------------------|------------------|
|                                               | DM, n=1012                           |                         | No DM, n=8097           |                         |                  | DM, n=369                         |                         | No DM, n=1065           |                         |                  |
|                                               | Data available<br>n (%)              | Data available<br>n (%) | Data available<br>n (%) | Data available<br>n (%) |                  | Data available<br>n (%)           | Data available<br>n (%) | Data available<br>n (%) | Data available<br>n (%) |                  |
| <b>RF+, n (%)</b>                             | 535 (56.7)                           | 942 (93.1)              | 4347 (58.4)             | 7443 (91.9)             | 0.345            | 177 (52.2)                        | 339 (91.9)              | 613 (61.7)              | 994 (93.3)              | <b>0.002</b>     |
| <b>ACPA+, n (%)</b>                           | 465 (55.4)                           | 839 (82.9)              | 3927 (58.5)             | 6717 (83.0)             | 0.092            | 155 (50.8)                        | 305 (82.7)              | 525 (58.5)              | 898 (84.3)              | <b>0.020</b>     |
| <b>Disease duration (years), median (IQR)</b> | 8.0 (3.6-15.0)                       | 715 (70.7)              | 8.0 (3.8-15.0)          | 5415 (66.9)             | 0.555            | 8.4 (4.0-15.0)                    | 196 (53.1)              | 10.0 (4.0-18.0)         | 584 (54.8)              | 0.169            |
| <b>DAS28-ESR, median (IQR)</b>                | 3.2 (2.3-4.3)                        | 756 (74.7)              | 2.8 (2.0-3.9)           | 5828 (72.0)             | <b>&lt;0.001</b> | 3.2 (2.5-4.4)                     | 263 (73.0)              | 3.1 (2.2-4.3)           | 778 (73.1)              | <b>0.017</b>     |
| <b>CRP, median (IQR)</b>                      | 2.9 (1.0-6.6)                        | 588 (58.1)              | 2.9 (1.5-6.8)           | 4875 (60.2)             | 0.171            | 3.5 (2.9-10.2)                    | 227 (61.5)              | 3.3 (2.9-8.9)           | 724 (68.1)              | 0.510            |
| <b>ESR, median (IQR)</b>                      | 21 (10-36)                           | 888 (87.7)              | 16 (7-30)               | 7028 (86.8)             | <b>&lt;0.001</b> | 25 (12-43)                        | 330 (89.4)              | 17 (8-32)               | 962 (90.3)              | <b>&lt;0.001</b> |
| <b>RA medications, n (%)</b>                  |                                      |                         |                         |                         |                  |                                   |                         |                         |                         |                  |
| Methotrexate                                  | 597 (61.3)                           | 974 (96.2)              | 4768 (62.0)             | 7687 (94.9)             | 0.657            | 177 (48.6)                        | 364 (98.6)              | 571 (55.8)              | 1023 (96.1)             | <b>0.018</b>     |
| Any other conventional DMARD                  | 371 (38.1)                           | 974 (96.2)              | 2846 (37.0)             | 7687 (94.9)             | 0.516            | 143 (39.3)                        | 364 (98.6)              | 399 (39.0)              | 1023 (96.1)             | 0.924            |
| Biologic DMARDs                               |                                      | 943 (93.2)              |                         | 7326 (90.5)             |                  |                                   | 352 (95.4)              |                         | 961 (90.2)              |                  |
| Current use,                                  | 269 (28.5)                           |                         | 2110 (28.8)             |                         |                  | 65 (18.5)                         |                         | 217 (22.6)              |                         |                  |
| Previous use                                  | 137 (14.5)                           |                         | 953 (13.0)              |                         | 0.426            | 74 (21.0)                         |                         | 167 (17.4)              |                         | 0.142            |
| Never                                         | 537 (57.0)                           |                         | 4263 (58.2)             |                         |                  | 213 (60.5)                        |                         | 577 (60.0)              |                         |                  |
| Glucocorticoids                               |                                      | 967 (95.6)              |                         | 7572 (93.5)             |                  |                                   | 364 (98.6)              |                         | 1012 (95.0)             |                  |
| Current use                                   | 415 (42.9)                           |                         | 3062 (40.4)             |                         |                  | 142 (39.0)                        |                         | 470 (46.4)              |                         |                  |
| Previous use                                  | 534 (55.2)                           |                         | 4249 (56.1)             |                         | <b>0.018</b>     | 218 (59.9)                        |                         | 526 (52.0)              |                         | <b>0.033</b>     |
| Never                                         | 18 (1.9)                             |                         | 261 (3.4)               |                         |                  | 4 (1.1)                           |                         | 16 (1.6)                |                         |                  |

For categorical variables, valid percentages are reported

\*Chi-squared test for frequencies and Mann-Whitney U test for continuous variables

Abbreviations: RF, rheumatoid factor; ACPA, anti-citrullinated protein antibodies; DAS28, disease activity score-28; CRP, C-reactive protein; ESR, erythrocyte sedimentation rate; DMARD, disease modifying antirheumatic drugs, significant p-values are highlighted in bold.
